# Supplementary material for: Human-induced escalation of compound coastal marine–terrestrial heatwave associated with humid-heat stress on European coasts
Source: Research Square preprint supplement (doi:10.21203/rs.3.rs-7636199/v1), 2025-10-20
Supplement: Supplementary file 1 [file 1060b3549f6fcba3ff9a2215.pdf]

# **Supplementary material**

## **Human-induced escalation of compound coastal marine–terrestrial heatwaves and humid-heat stress on European coasts**

**Armineh Barkhordarian<sup>1,\*</sup>, Eline Brunet<sup>1,2</sup>, and Johanna Baehr<sup>1</sup>**

<sup>1</sup>Institute of Oceanography, Universität Hamburg, Hamburg, Germany

<sup>2</sup>Institut Universitaire Européen de la Mer (IUEM), Université de Bretagne Occidentale (UBO), France

\*armineh.barkhordarian@uni-hamburg.de

### **ABSTRACT**

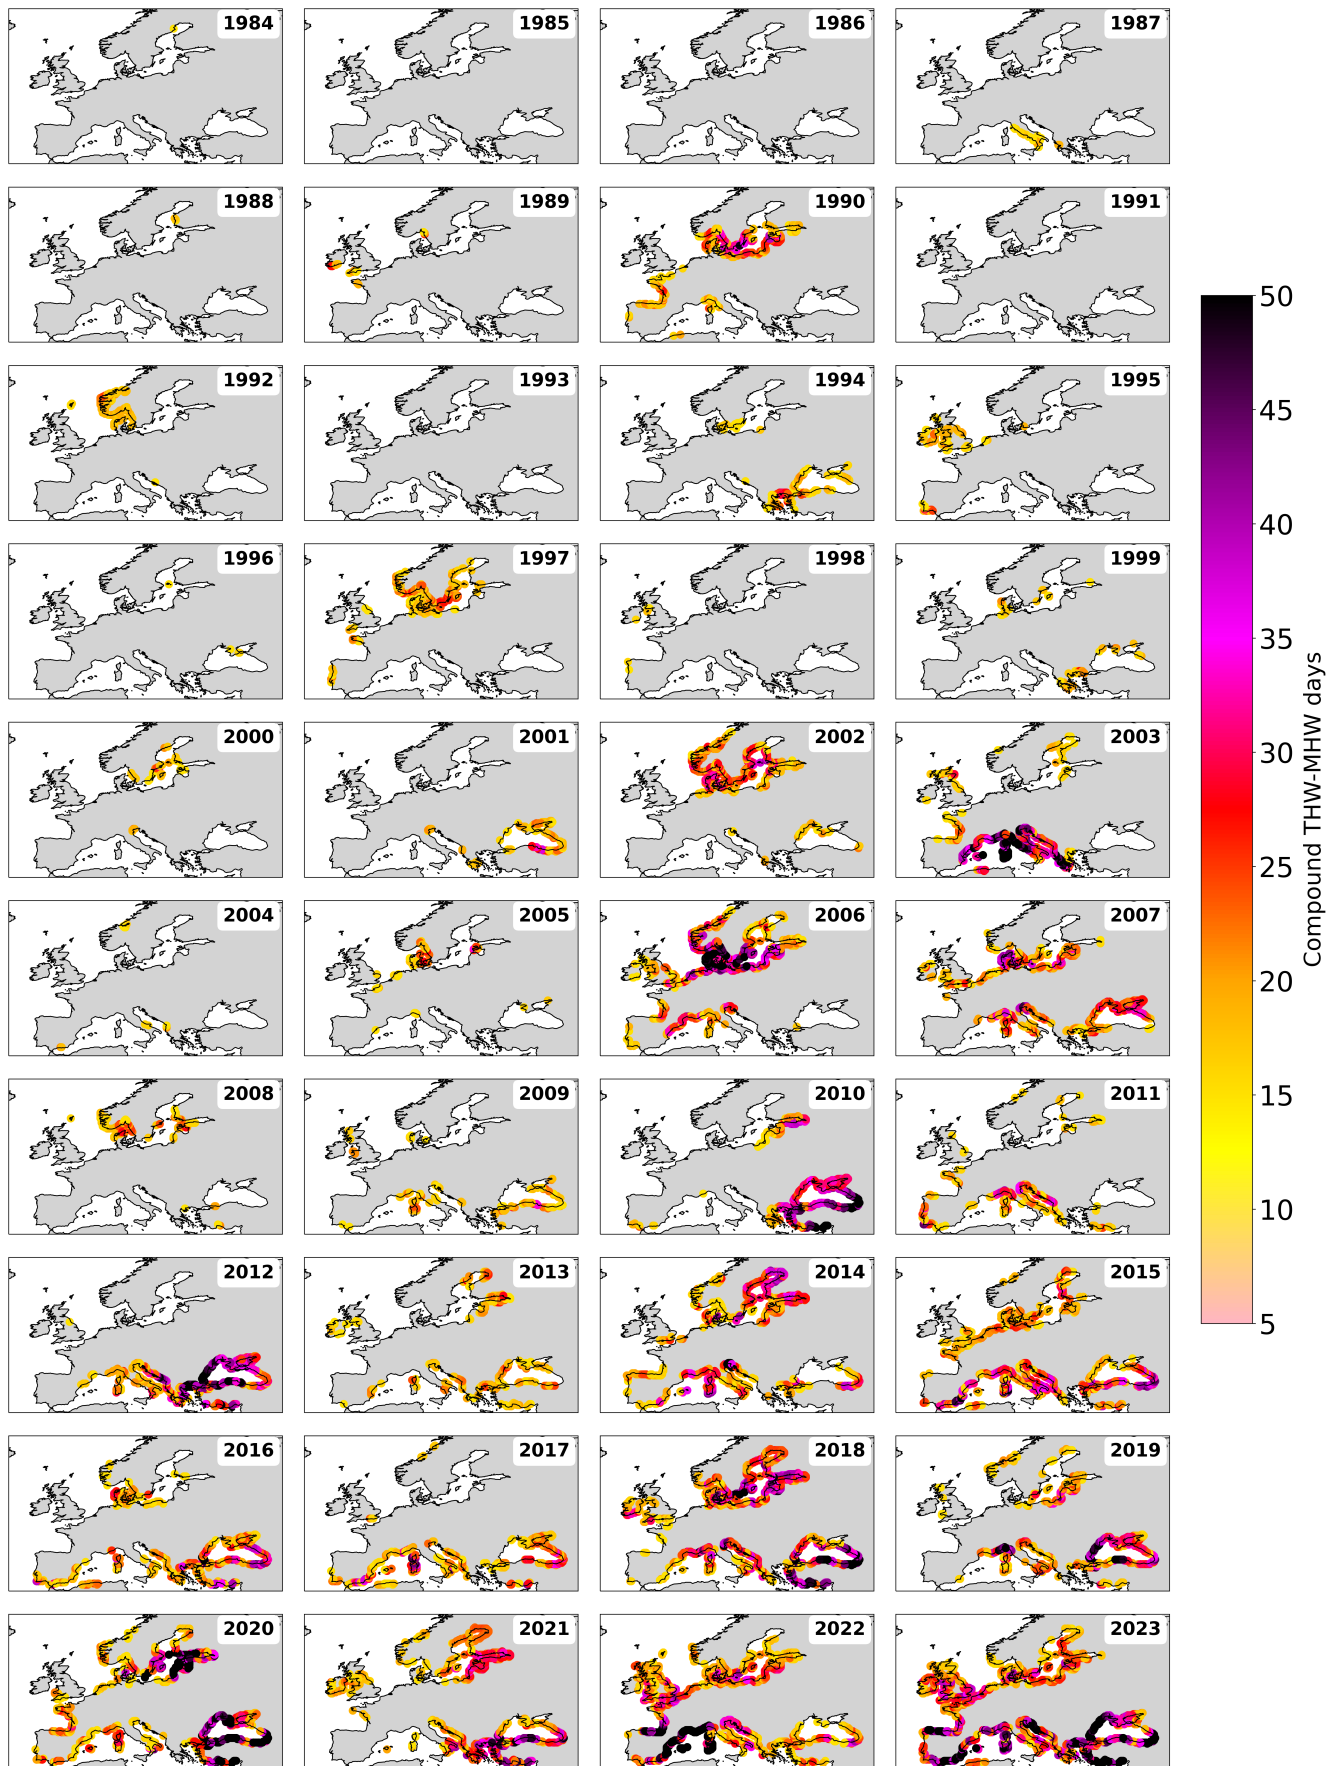

**Figure 1.** Observed annual spatial distribution of compound coastal marine–terrestrial heatwave (MHW–THW) days from 1984 to 2023, based on OISST and E-OBS observational records.
